# Supplementary material for: Allosteric mechanisms underlying the adaptive increase in hemoglobin-oxygen affinity of the bar-headed goose
Source: Oxford University Press journal article supplement (doi:10.1242/jeb.185470), 2018-01-01
Supplement: jeb185470supp.pdf [file jeb185470supp.pdf]

## Supplementary material

**Figure S1. Alignment of  $\alpha$ -type globin sequences from bar-headed goose and greylag goose.** The  $\alpha^A$ - and  $\alpha^D$ -globins comprise the  $\alpha$ -type subunits of the major HbA and the minor HbD isoforms, respectively.

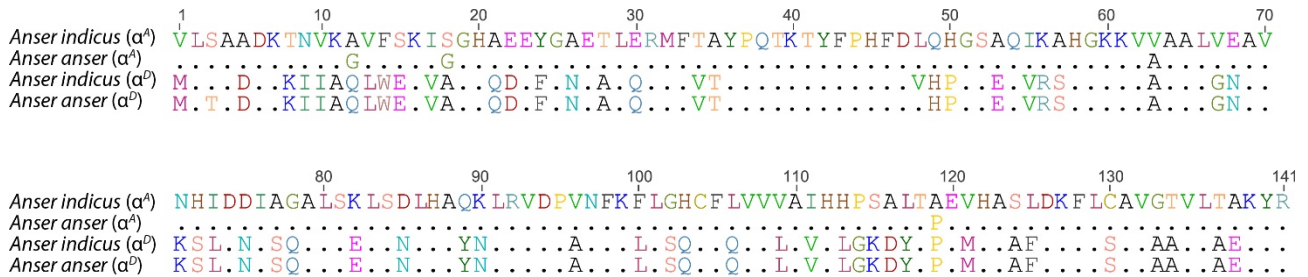

**Figure S2. Purification of HbA and HbD by anion exchange chromatography of bar-headed goose (A, left panel) and graylag goose (B, left panel) hemolysates, and corresponding analysis of peaks by isoelectric focusing (right panels).** In the chromatograms (absorbance, continuous lines), peak 1 passes unbound through the column and corresponds to the major HbA, peak 3 corresponds to the minor HbD, while peak 2 contains HbA, presumably due to protein washout at the onset of the salt gradient (dashed line).

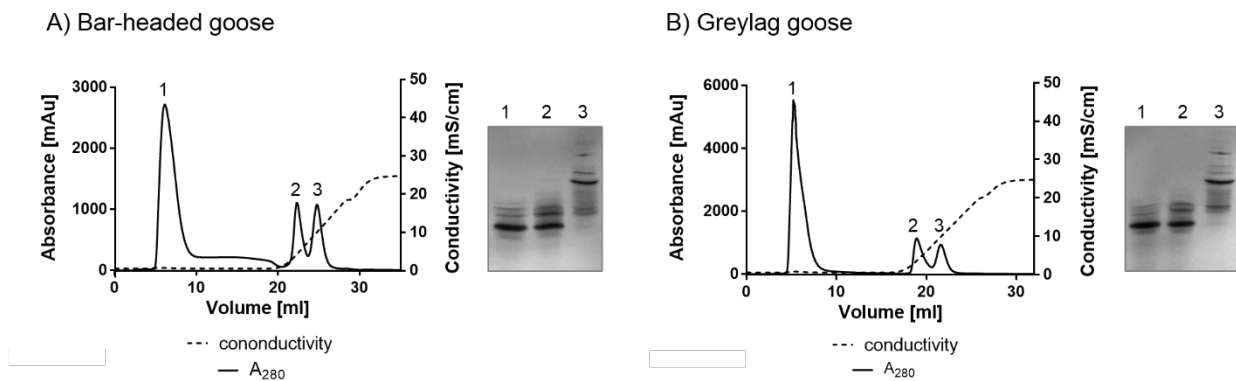

**Table S1. O<sub>2</sub> affinity ( $P_{50}$ , torr), Hill cooperativity coefficient ( $n_{50}$ ) and Bohr effect (expressed as Bohr factor  $\Phi = \Delta \log P_{50} / \Delta \log \text{pH}$ ) of HbA and HbD from bar-headed goose and graylag goose.** Experiments were performed in the absence (stripped) and presence of 0.1 M KCl and 0.15 mM IHP, added separately and in combination. Experiments were done at a heme concentration of 0.3 mM, 37 °C, in 0.1 M HEPES buffer, pH 7.4. Data are means of duplicate experiments (variation was < 10%), except for the Bohr effect, where  $\Phi$  is derived from linear regression (linear plots of Fig. 2E,F). n.d., not determined.

| Species          | Conditions | HbA             |               |          |        | HbD             |               |          |        |
|------------------|------------|-----------------|---------------|----------|--------|-----------------|---------------|----------|--------|
|                  |            | $P_{50}$ (torr) | $\log P_{50}$ | $n_{50}$ | $\Phi$ | $P_{50}$ (torr) | $\log P_{50}$ | $n_{50}$ | $\Phi$ |
| Bar-headed goose | stripped   | 3.72            | 0.57          | 2.35     | -0.36  | 2.79            | 0.45          | 2.15     | -0.35  |
|                  | KCl        | 4.38            | 0.64          | 2.58     | n.d.   | 3.20            | 0.51          | 2.13     | n.d.   |
|                  | IHP        | 46.22           | 1.66          | 3.21     | -0.55  | 29.84           | 1.47          | 2.94     | -0.45  |
|                  | IHP+KCl    | 34.71           | 1.54          | 3.67     | n.d.   | 24.29           | 1.39          | 2.95     | n.d.   |
| Greylag goose    | stripped   | 4.24            | 0.63          | 2.29     | -0.35  | 4.60            | 0.66          | 1.93     | -0.39  |
|                  | KCl        | 6.05            | 0.78          | 3.00     | n.d.   | 6.47            | 0.81          | 1.51     | n.d.   |
|                  | IHP        | 60.22           | 1.78          | 2.94     | -0.45  | 45.28           | 1.66          | 3.18     | -0.43  |
|                  | IHP+KCl    | 49.37           | 1.69          | 2.78     | n.d.   | 35.24           | 1.55          | 3.50     | n.d.   |

**Table S2. Thermodynamic MWC allosteric parameters for O<sub>2</sub> binding of HbA and HbD from bar-headed goose and graylag goose in the absence (stripped) and presence of 0.15 mM IHP, fitted within 95% confidence limits.** Experiments (shown in Fig. 4) were performed at 37 °C (heme concentration 0.3 mM, 0.1 M HEPES buffer, pH 7.4). MWC parameters of recombinant adult human Hb wild type (wt) and  $\alpha 119\text{Pro} \rightarrow \text{Ala}$  mutant obtained under stripped conditions at 25 °C (heme concentration 0.146 mM, 0.1 M HEPES, pH ~7.25) (Weber et al., 1993) are shown for comparison.  $P_{50}$ , O<sub>2</sub> tension at half-saturation;  $P_m$ , median O<sub>2</sub> tension;  $n_{50}$  and  $n_{\max}$ , half-saturation and maximal Hill's cooperativity coefficients;  $K_T$  and  $K_R$  (torr<sup>-1</sup>), O<sub>2</sub> association equilibrium constant of T- and R-states, respectively;  $c = K_T/K_R$ ;  $\Delta G$  (kcal mol<sup>-1</sup>), free energy of cooperativity ( $\Delta G = -RT \ln K_T/K_R$ , where R is the gas constant and T is the absolute temperature). Fitting correlation coefficient  $r^2$  is indicated.

| Parameter                            | Bar-headed goose |       |          |       | Greylag goose |       |          |       | Human Hb at 25°C (Weber et al. 1993) |                                                  |
|--------------------------------------|------------------|-------|----------|-------|---------------|-------|----------|-------|--------------------------------------|--------------------------------------------------|
|                                      | HbA              |       | HbD      |       | HbA           |       | HbD      |       | Hb wt                                | Hb $\alpha 119\text{Pro} \rightarrow \text{Ala}$ |
|                                      | stripped         | IHP   | stripped | IHP   | stripped      | IHP   | stripped | IHP   | stripped                             | stripped                                         |
| $P_{50}$ (torr)                      | 3.37             | 44.68 | 2.74     | 29.39 | 4.10          | 57.30 | 4.05     | 47.21 | 2.00                                 | 1.12                                             |
| $P_m$ (torr)                         | 3.64             | 43.82 | 2.98     | 29.27 | 4.31          | 54.46 | 4.39     | 47.04 | 1.84                                 | 1.05                                             |
| $n_{50}$                             | 2.67             | 3.44  | 1.97     | 3.05  | 2.57          | 3.09  | 2.17     | 3.01  |                                      |                                                  |
| $n_{\max}$                           | 2.74             | 3.45  | 1.93     | 3.05  | 2.60          | 3.13  | 2.13     | 3.01  |                                      |                                                  |
| $K_T$ (torr <sup>-1</sup> )          | 0.012            | 0.002 | 0.040    | 0.003 | 0.022         | 0.003 | 0.023    | 0.002 | 0.170                                | 0.448                                            |
| $K_R$ (torr <sup>-1</sup> )          | 1.20             | 0.76  | 0.86     | 0.38  | 1.07          | 0.61  | 0.68     | 0.22  | 6.22                                 | 6.22                                             |
| $\log L$                             | 2.57             | 6.08  | 1.62     | 4.18  | 2.65          | 6.10  | 1.90     | 4.08  | 4.24                                 | 3.28                                             |
| $c$                                  | 0.010            | 0.002 | 0.046    | 0.009 | 0.021         | 0.004 | 0.033    | 0.010 |                                      |                                                  |
| $\Delta G$ (kcal mol <sup>-1</sup> ) | 2.69             | 3.77  | 1.65     | 2.89  | 2.33          | 3.30  | 1.90     | 2.83  | 2.13                                 | 1.56                                             |
| $r^2$                                | 0.998            | 0.998 | 0.998    | 0.999 | 0.998         | 0.998 | 0.998    | 0.998 |                                      |                                                  |

## References

**Weber, R. E., Jessen, T. H., Malte, H. and Tame, J.** (1993). Mutant hemoglobins (alpha 119-Ala and beta 55-Ser): functions related to high-altitude respiration in geese. *J. Appl. Physiol.* **75**, 2646-2655.
